# Supplementary material
Source: MDPI journal article supplement (https://www.mdpi.com/2072-4292/12/24/4019)
Supplement: s1 [file s1]

# Quantification and Mapping of Satellite Driven Surface Energy Balance Fluxes in Semi-arid to Arid Inter-Mountain Region

Bibek Acharya <sup>1</sup>, Vivek Sharma <sup>1,\*</sup>, James Heitholt <sup>2</sup>, Daniel Tekiela <sup>2</sup> and Fabian Nippgen <sup>3</sup>

<sup>1</sup> Agricultural and Biological Engineering Department, Institute of Food and Agricultural Sciences, University of Florida, Gainesville, 32611, USA

<sup>2</sup> Department of Plant Sciences, College of Agriculture and Natural Resources, University of Wyoming, Laramie, 82071, USA

<sup>3</sup> Department of Ecosystem Sciences and Management, College of Agriculture and Natural Resources, University of Wyoming, Laramie, 82071, USA

\* Correspondence: Vivek Sharma, vsharma1@ufl.edu; Tel.: +1-352-294-6725

## Supplement Material:

Table S1. Average seasonal crop evapotranspiration  $ET_c$ , seasonal precipitation (P) and Irrigation contribution to  $ET_c$  ( $ET_c-P$ ) for four major crops i.e. Sugar beet, Dry bean, Alfalfa, and Maize within Cody Canal Irrigation District for 2017 and 2018.

| Crop Type                      | Year | Seasonal $ET_c$ (mm) | Seasonal P (mm) | $ET_c-P$ (mm) | % of irrigation contributing to $ET_c$ |
|--------------------------------|------|----------------------|-----------------|---------------|----------------------------------------|
| Cody Canal Irrigation District |      |                      |                 |               |                                        |
| Sugar beet                     | 2017 | 657                  | 158             | 499           | 76                                     |
|                                | 2018 | 651                  | 204             | 447           | 69                                     |
| Dry bean                       | 2017 | 566                  | 158             | 408           | 72                                     |
|                                | 2018 | 529                  | 204             | 325           | 61                                     |
| Alfalfa                        | 2017 | 726                  | 158             | 568           | 78                                     |
|                                | 2018 | 683                  | 204             | 479           | 70                                     |
| Maize                          | 2017 | 675                  | 158             | 517           | 77                                     |
|                                | 2018 | 632                  | 204             | 428           | 68                                     |

Table S2. Average seasonal crop evapotranspiration  $ET_c$ , seasonal precipitation (P) and Irrigation contribution to  $ET_c$  ( $ET_c-P$ ) for four major crops i.e. Sugar beet, Dry bean, Alfalfa, and Maize within Deaver Irrigation District for 2017 and 2018.

| Crop Type                  | Year | Seasonal ET <sub>c</sub><br>(mm) | Seasonal P<br>(mm) | ET <sub>c</sub> -P<br>(mm) | % of irrigation<br>contributing to ET <sub>c</sub> |
|----------------------------|------|----------------------------------|--------------------|----------------------------|----------------------------------------------------|
| Deaver Irrigation District |      |                                  |                    |                            |                                                    |
| Sugar beet                 | 2017 | 680                              | 117                | 563                        | 83                                                 |
|                            | 2018 | 664                              | 158.4              | 506                        | 76                                                 |
| Dry bean                   | 2017 | 516                              | 117                | 399                        | 77                                                 |
|                            | 2018 | 439                              | 158.4              | 281                        | 64                                                 |
| Alfalfa                    | 2017 | 680                              | 117                | 563                        | 83                                                 |
|                            | 2018 | 623                              | 158.4              | 464                        | 75                                                 |
| Maize                      | 2017 | 613                              | 117                | 496                        | 81                                                 |
|                            | 2018 | 599                              | 158.4              | 440                        | 74                                                 |

Table S3. Average seasonal crop evapotranspiration ET<sub>c</sub>, seasonal precipitation (P) and Irrigation contribution to ET<sub>c</sub> (ET<sub>c</sub>-P) for four major crops i.e. Sugar beet, Dry bean, Alfalfa, and Maize within Greybull Valley Irrigation District for 2017 and 2018.

| Crop Type                           | Year | Seasonal ET <sub>c</sub><br>(mm) | Seasonal P<br>(mm) | P | ET <sub>c</sub> -P<br>(mm) | % of irrigation<br>contributing to<br>ET <sub>c</sub> |
|-------------------------------------|------|----------------------------------|--------------------|---|----------------------------|-------------------------------------------------------|
| Greybull Valley Irrigation District |      |                                  |                    |   |                            |                                                       |
| Sugar beet                          | 2017 | 593                              | 125                |   | 467                        | 79                                                    |
|                                     | 2018 | 610                              | 162                |   | 448                        | 73                                                    |
| Dry bean                            | 2017 | 503                              | 125                |   | 377                        | 75                                                    |
|                                     | 2018 | 479                              | 162                |   | 316                        | 66                                                    |
| Alfalfa                             | 2017 | 664                              | 125                |   | 538                        | 81                                                    |
|                                     | 2018 | 633                              | 162                |   | 470                        | 74                                                    |
| Maize                               | 2017 | 563                              | 125                |   | 438                        | 78                                                    |
|                                     | 2018 | 622                              | 162                |   | 459                        | 74                                                    |

Table S4. Average seasonal crop evapotranspiration ET<sub>c</sub>, seasonal precipitation (P) and Irrigation contribution to ET<sub>c</sub> (ET<sub>c</sub>-P) for our major crops i.e. Sugar beet, Dry bean, Alfalfa, and Maize within Heart Mountain Irrigation District for 2017 and 2018.

| Crop Type                          | Year | Seasonal ET <sub>c</sub> (mm) | Seasonal P (mm) | ET <sub>c</sub> -P (mm) | % of irrigation contributing to ET <sub>c</sub> |
|------------------------------------|------|-------------------------------|-----------------|-------------------------|-------------------------------------------------|
| Heart Mountain Irrigation District |      |                               |                 |                         |                                                 |
| Sugar beet                         | 2017 | 732                           | 146.1           | 586                     | 80                                              |
|                                    | 2018 | 673                           | 196.9           | 476                     | 71                                              |
| Dry bean                           | 2017 | 529                           | 146.1           | 383                     | 72                                              |
|                                    | 2018 | 489                           | 196.9           | 292                     | 60                                              |
| Alfalfa                            | 2017 | 761                           | 146.1           | 615                     | 81                                              |
|                                    | 2018 | 711                           | 196.9           | 514                     | 72                                              |
| Maize                              | 2017 | 659                           | 146.1           | 513                     | 78                                              |
|                                    | 2018 | 683                           | 196.9           | 486                     | 71                                              |

Table S5. Average seasonal crop evapotranspiration ET<sub>c</sub>, seasonal precipitation (P) and Irrigation contribution to ET<sub>c</sub> (ET<sub>c</sub>-P) for four major crops i.e. Sugar beet, Dry bean, Alfalfa, and Maize within Hunt & Godfrey Irrigation District for 2017 and 2018.

| Crop Type                          | Year | Seasonal ET <sub>c</sub> (mm) | Seasonal P (mm) | ET <sub>c</sub> -P (mm) | % of irrigation contributing to ET <sub>c</sub> |
|------------------------------------|------|-------------------------------|-----------------|-------------------------|-------------------------------------------------|
| Hunt & Godfrey Irrigation District |      |                               |                 |                         |                                                 |
| Sugar beet                         | 2017 | 643                           | 124             | 519                     | 81                                              |
|                                    | 2018 | 561                           | 177             | 384                     | 68                                              |
| Dry bean                           | 2017 | 601                           | 124             | 477                     | 79                                              |
|                                    | 2018 | 494                           | 177             | 316                     | 64                                              |
| Alfalfa                            | 2017 | 747                           | 124             | 623                     | 83                                              |
|                                    | 2018 | 687                           | 177             | 510                     | 74                                              |
| Maize                              | 2017 | 684                           | 124             | 560                     | 82                                              |
|                                    | 2018 | 595                           | 177             | 417                     | 70                                              |

Table S6. Average seasonal crop evapotranspiration ET<sub>c</sub>, seasonal precipitation (P) and Irrigation contribution to ET<sub>c</sub> (ET<sub>c</sub>-P) for four major crops i.e. Sugar beet, Dry bean, Alfalfa, and Maize within Lovell Irrigation District for 2017 and 2018.

| Crop Type                  | Year | Seasonal<br>(mm) | ET <sub>c</sub> | Seasonal<br>(mm) | P | ET <sub>c</sub> -P<br>(mm) | % of irrigation<br>contributing to ET <sub>c</sub> |
|----------------------------|------|------------------|-----------------|------------------|---|----------------------------|----------------------------------------------------|
| Lovell Irrigation District |      |                  |                 |                  |   |                            |                                                    |
| Sugar beet                 | 2017 | 602              |                 | 121.1            |   | 481                        | 80                                                 |
|                            | 2018 | 620              |                 | 164.4            |   | 456                        | 73                                                 |
| Dry bean                   | 2017 | 579              |                 | 121.1            |   | 458                        | 79                                                 |
|                            | 2018 | 554              |                 | 164.4            |   | 389                        | 70                                                 |
| Alfalfa                    | 2017 | 734              |                 | 121.1            |   | 613                        | 83                                                 |
|                            | 2018 | 675              |                 | 164.4            |   | 510                        | 76                                                 |
| Maize                      | 2017 | 630              |                 | 121.1            |   | 509                        | 81                                                 |
|                            | 2018 | 607              |                 | 164.4            |   | 443                        | 73                                                 |

Table S7. Average seasonal crop evapotranspiration ET<sub>c</sub>, seasonal precipitation (P) and Irrigation contribution to ET<sub>c</sub> (ET<sub>c</sub>-P) for four major crops i.e. Sugar beet, Dry bean, Alfalfa, and Maize within Shoshone Irrigation District for 2017 and 2018.

| Crop Type                    | Year | Seasonal<br>(mm) | ET <sub>c</sub> | Seasonal<br>(mm) | P | ET <sub>c</sub> -P<br>(mm) | % of irrigation<br>contributing to<br>ET <sub>c</sub> |
|------------------------------|------|------------------|-----------------|------------------|---|----------------------------|-------------------------------------------------------|
| Shoshone Irrigation District |      |                  |                 |                  |   |                            |                                                       |
| Sugar beet                   | 2017 | 638              |                 | 125              |   | 512                        | 80                                                    |
|                              | 2018 | 645              |                 | 167              |   | 478                        | 74                                                    |
| Dry bean                     | 2017 | 493              |                 | 125              |   | 367                        | 75                                                    |
|                              | 2018 | 484              |                 | 167              |   | 317                        | 65                                                    |
| Alfalfa                      | 2017 | 677              |                 | 125              |   | 552                        | 81                                                    |
|                              | 2018 | 665              |                 | 167              |   | 498                        | 75                                                    |
| Maize                        | 2017 | 565              |                 | 125              |   | 439                        | 78                                                    |
|                              | 2018 | 676              |                 | 167              |   | 508                        | 75                                                    |

Table S8. Average seasonal crop evapotranspiration ET<sub>c</sub>, seasonal precipitation (P) and Irrigation contribution to ET<sub>c</sub> (ET<sub>c</sub>-P) for four major crops i.e. Sugar beet, Dry bean, Alfalfa, and Maize within Sidon Irrigation District for 2017 and 2018.

| Crop Type                 | Year | Seasonal ET <sub>c</sub> (mm) | Seasonal P (mm) | ET <sub>c</sub> -P (mm) | % of irrigation contributing to ET <sub>c</sub> |
|---------------------------|------|-------------------------------|-----------------|-------------------------|-------------------------------------------------|
| Sidon Irrigation District |      |                               |                 |                         |                                                 |
| Sugar beet                | 2017 | 632                           | 121.1           | 511                     | 81                                              |
|                           | 2018 | 637                           | 151.2           | 485                     | 76                                              |
| Dry bean                  | 2017 | 530                           | 121.1           | 408                     | 77                                              |
|                           | 2018 | 529                           | 151.2           | 378                     | 71                                              |
| Alfalfa                   | 2017 | 663                           | 121.1           | 542                     | 82                                              |
|                           | 2018 | 652                           | 151.2           | 501                     | 77                                              |
| Maize                     | 2017 | 635                           | 121.1           | 514                     | 81                                              |
|                           | 2018 | 617                           | 151.2           | 466                     | 76                                              |

Table S9. Average seasonal crop evapotranspiration ET<sub>c</sub>, seasonal precipitation (P) and Irrigation contribution to ET<sub>c</sub> (ET<sub>c</sub>-P) for four major crops i.e. Sugar beet, Dry bean, Alfalfa, and Maize within Will Wood Irrigation District for 2017 and 2018.

| Crop Type                     | Year | Seasonal ET <sub>c</sub> (mm) | Seasonal P (mm) | ET <sub>c</sub> -P (mm) | % of irrigation contributing to ET <sub>c</sub> |
|-------------------------------|------|-------------------------------|-----------------|-------------------------|-------------------------------------------------|
| Will Wood Irrigation District |      |                               |                 |                         |                                                 |
| Sugar beet                    | 2017 | 641                           | 124             | 516                     | 81                                              |
|                               | 2018 | 698                           | 153             | 545                     | 78                                              |
| Dry bean                      | 2017 | 537                           | 124             | 413                     | 77                                              |
|                               | 2018 | 534                           | 153             | 381                     | 71                                              |
| Alfalfa                       | 2017 | 692                           | 124             | 568                     | 82                                              |
|                               | 2018 | 691                           | 153             | 538                     | 78                                              |
| Maize                         | 2017 | 625                           | 124             | 501                     | 80                                              |
|                               | 2018 | 712                           | 153             | 559                     | 78                                              |
